# Supplementary material for: Metal-free heterojunction of black phosphorus/oxygen-enriched porous g-C3N4 as an efficient photocatalyst for Fenton-like cascade water purification
Source: Royal Society of Chemistry journal article supplement (doi:10.1039/d0ta06993k), 2020-01-01
Supplement: d0ta06993k1.pdf [file d0ta06993k1.pdf]

# **Metal-free heterojunction of black phosphorus/oxygen-enriched porous g-C<sub>3</sub>N<sub>4</sub> as efficient photocatalyst for Fenton-like cascade water purification**

Jundie Hu,<sup>\*a</sup> Cao Chen,<sup>a</sup> Tao Hu,<sup>a</sup> Jingsha Li,<sup>a</sup> Hao Lu,<sup>a</sup> Yang Zheng,<sup>a</sup> Xiaogang Yang,<sup>a</sup> Chunxian Guo<sup>\*ab</sup> and Chang Ming Li<sup>\*abc</sup>

<sup>a</sup>*Institute of Materials Science and Devices, Suzhou University of Science and Technology, Suzhou, 215009, P.R. China*

<sup>b</sup>*Jiangsu Key Laboratory for Micro and Nano Heat Fluid Flow Technology and Energy Application, Suzhou, 215009, P.R. China*

<sup>c</sup>*Institute for Clean Energy & Advanced Materials, Southwest University, Chongqing, 400715, P. R. China*

## *Supporting information*

### **Table of Contents**

|                                       |            |
|---------------------------------------|------------|
| <b>S1. Experimental section</b> ..... | <b>S2</b>  |
| <b>S2. Characterization</b> .....     | <b>S4</b>  |
| <b>S3. References</b> .....           | <b>S10</b> |

## S1. Experimental section

### ***Materials:***

Urea, *N*-methyl pyrrolidone (NMP), 5,5-dimethyl-1-pyrroline-*N*-oxide (DMPO), potassium chloride (KCl), methyl orange (MO), rhodamine B (RhB) and catechol were purchased from Tokyo Chemical Industry. Cerium sulfate ( $\text{Ce}(\text{SO}_4)_2$ ), potassium ferricyanide ( $\text{K}_3[\text{Fe}(\text{CN})_6]$ ), potassium hexacyanoferrate ( $\text{K}_4[\text{Fe}(\text{CN})_6]$ ), sodium sulphate ( $\text{Na}_2\text{SO}_4$ ), dibasic sodium phosphate ( $\text{Na}_2\text{HPO}_4$ ), sodium dihydrogen phosphate anhydrous ( $\text{NaH}_2\text{PO}_4$ ) and Nafion solution (10 vol%) were bought from Sigma Aldrich. Sulfuric acid ( $\text{H}_2\text{SO}_4$ ), nitric acid ( $\text{HNO}_3$ ), isopropanol (IPA) and methanol ( $\text{CH}_3\text{OH}$ ) were purchased from Sinopharm Chemical ReagentCo., Ltd (China). Bulk black phosphorus (BP, XF161, purity > 99.998%) was purchased from Nanjing XFNANO Materials Tech Co., Ltd.

***Synthesis of porous g-C<sub>3</sub>N<sub>4</sub> nanosheets (PCN):*** 20 g of urea and 20 mL of deionized water were added in an alumina crucible, the alumina crucible was ultrasonicated for 5 min to form a homogeneous dispersion before was placed in the muffle furnace. The porous g-C<sub>3</sub>N<sub>4</sub> nanosheets were obtained at high temperature by the thermal polycondensation of urea along with the pore-making effect of water. The temperature was rises to 400 °C at a ramp rate of 10 °C /min and maintained for 1h, then the temperature rises to 450 °C at the same rate and maintained for another 1 h. The light yellow porous g-C<sub>3</sub>N<sub>4</sub> nanosheets were observed after the progress, which was labeled as PCN. In addition, bulk g-C<sub>3</sub>N<sub>4</sub> was obtained in the same procedure without the addition of water.

***Synthesis of oxygen-enriched porous g-C<sub>3</sub>N<sub>4</sub> nanosheets (OPCN):*** The oxygen-enriched PCN were prepared by acid treatment, 1 g PCN were dispersed in the mixture acid of  $\text{H}_2\text{SO}_4$  (5 mL) and  $\text{HNO}_3$  (10 mL) carefully and stirred overnight, then the products were poured into 500 mL  $\text{H}_2\text{O}$  and stand still for 30 min, remove the acid though centrifugation and wash thoroughly with deionized water and ethanol, dried at 60 °C for 8 h for further use. The oxidized PCN was labeled as OPCN.

***Synthesis of BP nanosheets:*** BP nanosheets were synthesized by NMP liquid

exfoliation method. Typically, 20 mg of bulk black phosphorus were dispersed in 25 mL of NMP, then the suspension were sonicated in ice water for 12 h by using an ultrasonic homogenizer (SCIENTZ-IIID) with a power of 400 W. Afterward, the obtained brown solution was centrifuged at 3000 rpm for 15 min to remove non-exfoliated bulk black phosphorus, collect the supernatant for further use.

**Synthesis of BP/OPCN heterostructures:** BP/OPCN heterostructures were synthesized by an electrostatic self-assembly method. In brief, 0.1 g of the OPCN was dispersed into a certain amount of BP/NMP solution (ensure the quality of BP nanosheets are 2 mg, 4 mg, 6 mg, 8 mg and 10 mg, respectively), the suspension was kept stirring overnight at room temperature under Argon atmosphere. Then the products were collected by centrifugation and washed with EtOH for three times, and dried for 6 h under vacuum at 60 °C. The products were named according to mass ratios of BP nanosheets to OPCN, namely 2% BP/OPCN, 4% BP/OPCN, 6% BP/OPCN, 8% BP/OPCN and 10% BP/OPCN, respectively.

**Photocatalytic  $H_2O_2$  production:** In brief, 50 mg of samples was suspended into 50 mL of aqueous solution (volume ratio of water and isopropanol is 9:1, isopropanol is hole scavengers) in a Pyrex test tube equipped with circulating condensate, and the suspension was stirred in dark for 30 min to reach the absorption-desorption equilibrium. Then, open the 300 W Xenon lamp (PLS-SXE 300) ( $460 \text{ mW cm}^{-2}$ ) and start the reaction, sampling 1 mL of solution every hour and filter with a  $0.45 \mu\text{m}$  Millipore filter to remove the powder sample. Then the transparent liquid were injected into  $\text{Ce}(\text{SO}_4)_2$  solution to determine the  $\text{H}_2\text{O}_2$  concentration. All these reactions were executed in the air condition unless specifically stated under Ar or  $\text{O}_2$  atmosphere.

**$H_2O_2$  concentration measurement:** In this work,  $\text{Ce}(\text{SO}_4)_2$  titration method was used to measure the  $\text{H}_2\text{O}_2$  concentration. Initially, 200 mL of  $\text{Ce}(\text{SO}_4)_2$  solution (1 mM) was prepared, 0.2 mmol  $\text{Ce}(\text{SO}_4)_2$  was dispersed into 200 mL 0.5 M  $\text{H}_2\text{SO}_4$  solution, and fully ultrasonic treatment to obtain a bright yellow transparent solution. 10 mL of 1 mM  $\text{Ce}(\text{SO}_4)_2$  solution was added into the 1 mL of obtained liquid and kept for 10 min to ensure the reaction completely ( $2\text{Ce}^{4+} + \text{H}_2\text{O}_2 \rightarrow 2\text{Ce}^{3+} + 2\text{H}^+ + \text{O}_2$ ), then

measure the concentration of  $\text{Ce}^{4+}$  before and after the reaction by UV spectroscopy to calculate the amount of  $\text{H}_2\text{O}_2$  produced.

***H<sub>2</sub>O<sub>2</sub> decomposition behavior:*** The  $\text{H}_2\text{O}_2$  decomposition behaviors of the as-prepared samples were carried out to evaluate the stability of produced  $\text{H}_2\text{O}_2$  in the photocatalytic system. In brief, 50 mg samples were added into 50 mL of  $\text{H}_2\text{O}_2$  solution (1 mM) and dispersed evenly. Open the light source to start the decomposition reaction and sampling 1 mL of the reaction solution every 15 min to measure the remaining  $\text{H}_2\text{O}_2$ .

***Photocatalytic degradation of MO:*** Similarly, 50 mg of photocatalysts were dispersed into 100 mL of MO solution (20 ppm, 100 mL of  $\text{H}_2\text{O}$  or 90 mL of  $\text{H}_2\text{O}$  + 10 mL of IPA) in a Pyrex test tube. The mixture solution was stirred under dark for half an hour to achieve adsorption/desorption equilibrium, then turn on the 300 W Xenon lamp to start the reaction. Sampling 3 mL of solution at a certain time, remove the solids by centrifugation and filtration, then measure the solution concentration by UV-Vis spectrophotometer. Multiple cycles tests were also executed to determine the recyclability of the samples for wastewater purification.

## S2. Characterization

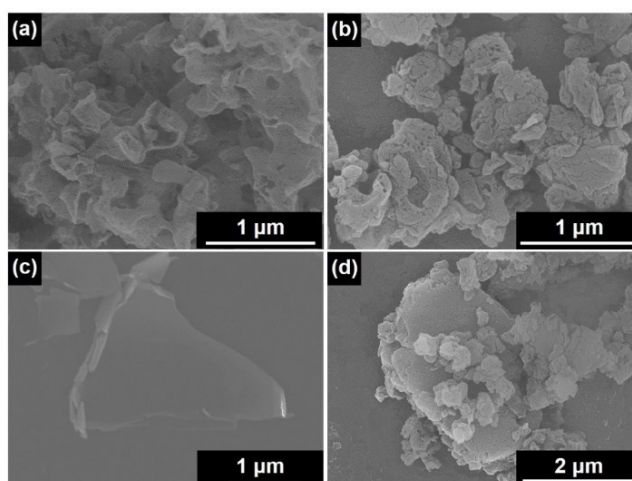

**Fig. S1** SEM images of (a) PCN, (b) OPCN, (c) BP, and (d) 6% BP/OPCN heterostructure.

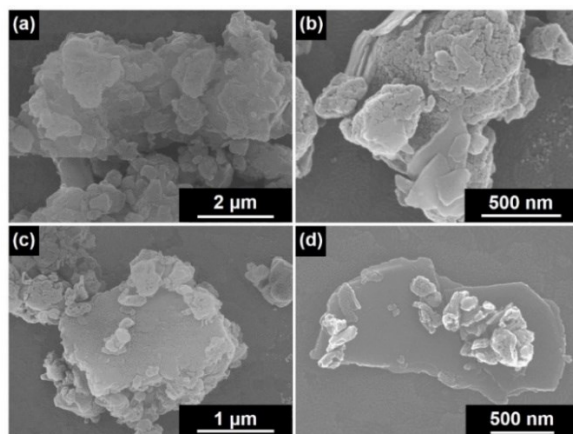

**Fig. S2** SEM images of (a) 2% BP/OPCN, (b) 4% BP/OPCN, (c) 8% BP/OPCN, and (d) 10% BP/OPCN heterostructure.

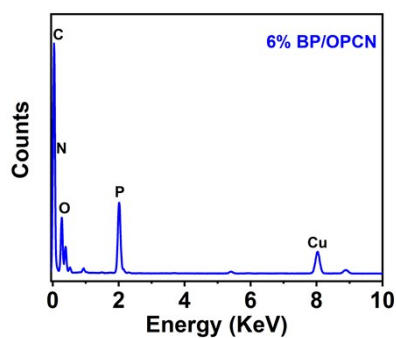

**Fig. S3** TEM-EDX of 6% BP/OPCN.

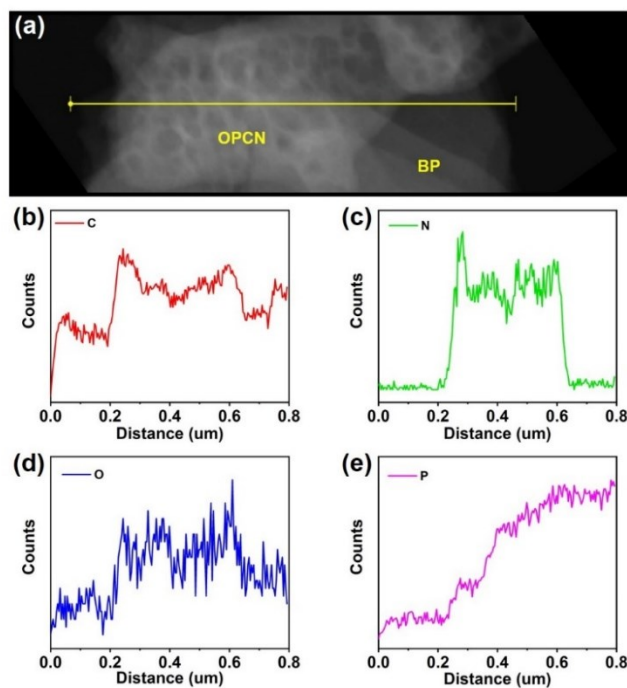

**Fig. S4** (a) STEM image of 6% BP/OPCN, the corresponding linear distributions of (b) C, (c) N, (d) O and (e) P.

**Table S1.** Atomic % of PCN and OPCN

| Element | Atomic % (PCN) | Atomic % (OPCN) |
|---------|----------------|-----------------|
| C 1s    | 48.99          | 47.19           |
| N 1s    | 48.55          | 46.28           |
| O 1s    | 2.46           | 6.53            |

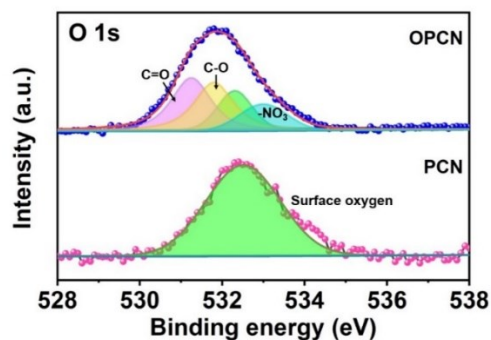**Fig. S5** High-resolution XPS spectra of O 1s.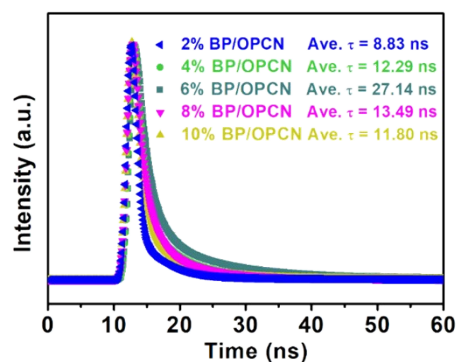**Fig. S6** TRPL spectra of BP/OPCN hybrids.**Table S2.** TRPL datas of BP/OPCN hybrids

|                  | 2%<br>BP/OPCN | 4%<br>BP/OPCN | 6%<br>BP/OPCN | 8%<br>BP/OPCN | 10%<br>BP/OPCN |
|------------------|---------------|---------------|---------------|---------------|----------------|
| $\tau_1$ / ns    | 3.06          | 5.01          | 10.98         | 4.91          | 4.45           |
| $\tau_2$ / ns    | 6.12          | 10.01         | 21.96         | 9.82          | 8.89           |
| $\tau_3$ / ns    | 12.25         | 20.03         | 43.91         | 19.64         | 17.79          |
| $A_1$ / %        | 31.64         | 43.17         | 38.90         | 35.47         | 37.51          |
| $A_2$ / %        | 8.35          | 12.45         | 18.04         | 9.38          | 10.02          |
| $A_3$ / %        | 60.01         | 44.38         | 43.06         | 55.15         | 52.47          |
| Ave. $\tau$ / ns | 8.83          | 12.29         | 27.14         | 13.49         | 11.8           |

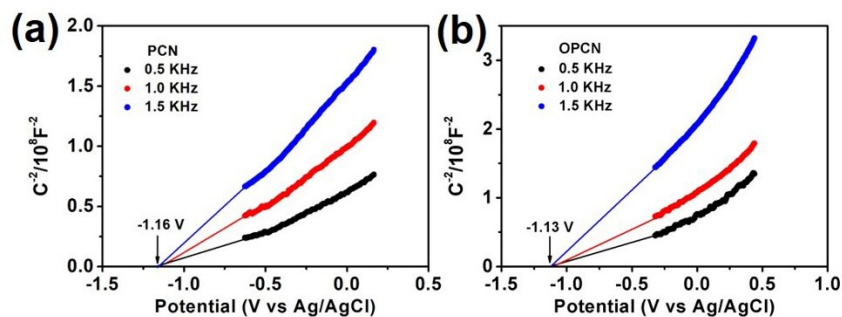

**Fig. S7** Mott-Schottky plots of (a) PCN and (b) OPCN.

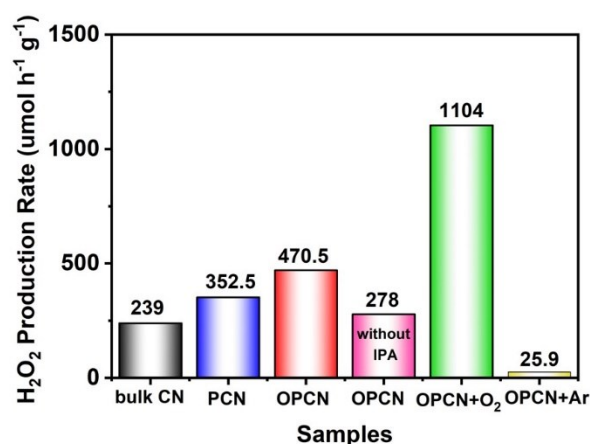

**Fig. S8** Photocatalytic H<sub>2</sub>O<sub>2</sub> production rate over different samples.

**Table S3** Comparison of H<sub>2</sub>O<sub>2</sub> generation rate of g-C<sub>3</sub>N<sub>4</sub>-based materials

| Catalysts                                                       | Light Source                   | Reaction Conditions                       | H <sub>2</sub> O <sub>2</sub> generation Rate (μmol h <sup>-1</sup> g <sup>-1</sup> ) | Reference |
|-----------------------------------------------------------------|--------------------------------|-------------------------------------------|---------------------------------------------------------------------------------------|-----------|
| BP/OPCN                                                         | 300 W Xe lamp, simulated solar | Aqueous solution (50 mL, IPA 10 vol. %)   | 3463                                                                                  | This work |
| g-C <sub>3</sub> N <sub>4</sub> /MI                             | 300 W Xe lamp, λ > 420 nm      | Aqueous solution (50 mL, TEOA 20 vol. %)  | 32                                                                                    | [S1]      |
| g-C <sub>3</sub> N <sub>4</sub> /CNTs                           | 300 W Xe lamp, λ ≥ 400 nm      | Aqueous solution (100 mL, HCOOH 5 vol. %) | 326                                                                                   | [S2]      |
| Ti <sub>3</sub> C <sub>2</sub> /g-C <sub>3</sub> N <sub>4</sub> | 300 W Xe lamp, λ > 420 nm      | Aqueous solution (50 mL, IPA 10 vol. %)   | 132                                                                                   | [S3]      |
| CoP/g-C <sub>3</sub> N <sub>4</sub>                             | 300 W Xe lamp, λ > 420 nm      | Aqueous solution (20 mL, EtOH 10 vol. %)  | 70                                                                                    | [S4]      |
| BP/CN                                                           | 300 W Xe lamp, λ > 420 nm      | Aqueous solution (30 mL, IPA 10 vol. %)   | 540                                                                                   | [S5]      |

|                                                         |                                            |                           |       |       |
|---------------------------------------------------------|--------------------------------------------|---------------------------|-------|-------|
| PEI/g-C <sub>3</sub> N <sub>4</sub>                     | 100 W Xe lamp with AM 1.5 air filter       | H <sub>2</sub> O (20 mL)  | 208.1 | [S6]  |
| rGO/BPQDs                                               | 300 W Xe lamp, 420 nm < $\lambda$ < 780 nm | H <sub>2</sub> O (50 mL)  | 60.5  | [S7]  |
| g-C <sub>3</sub> N <sub>4</sub> /BDI                    | Solar simulator, $\lambda$ > 420 nm        | H <sub>2</sub> O (30 mL)  | 17    | [S8]  |
| g-C <sub>3</sub> N <sub>4</sub> /PDI/rGO                | 2000 W Xe lamp, $\lambda$ > 420 nm         | H <sub>2</sub> O (30 mL)  | 24.2  | [S9]  |
| 3DOM g-C <sub>3</sub> N <sub>4</sub> /PW                | 300 W Xe lamp, $\lambda$ > 320 nm          | H <sub>2</sub> O (100 mL) | 24    | [S10] |
| g-C <sub>3</sub> N <sub>4</sub> /PWO                    | 300 W Xe lamp, $\lambda$ $\geq$ 420 nm     | H <sub>2</sub> O (100 mL) | 63    | [S11] |
| g-C <sub>3</sub> N <sub>4</sub> /CoWO                   | 300 W Xe lamp, $\lambda$ $\geq$ 420 nm     | H <sub>2</sub> O (100 mL) | 97    | [S12] |
| Phosphorus-doped porous g-C <sub>3</sub> N <sub>4</sub> | 300 W Xe lamp, $\lambda$ > 400 nm          | H <sub>2</sub> O (15 mL)  | 1968  | [S13] |

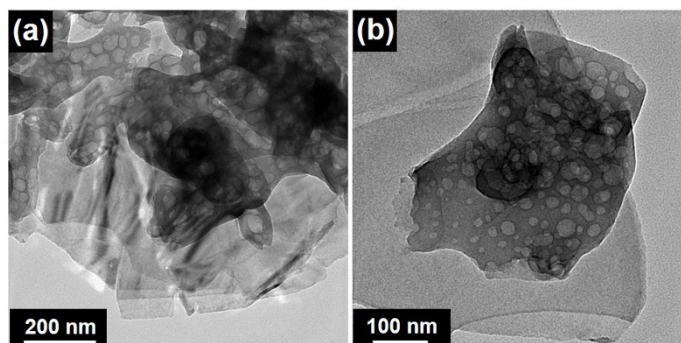

**Fig. S9** TEM images of 6% BP/OPCN hybrid after the multicycles experiments.



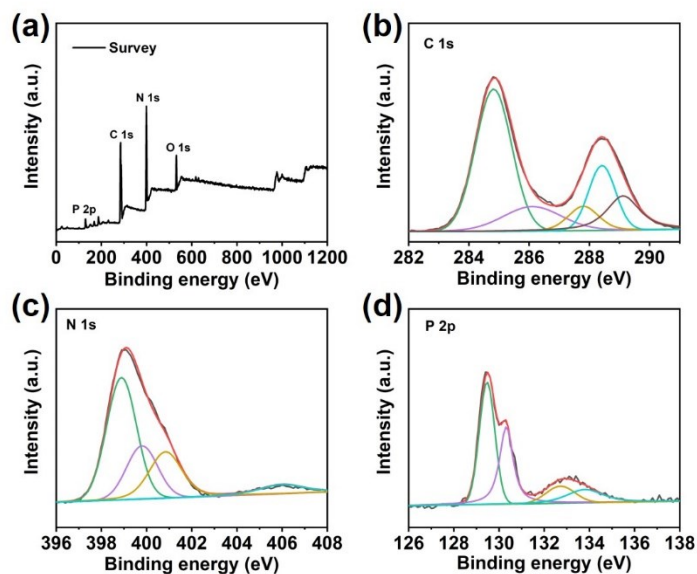

**Fig. S10** XPS spectra of 6% BP/OPCN after multicycles experiments.

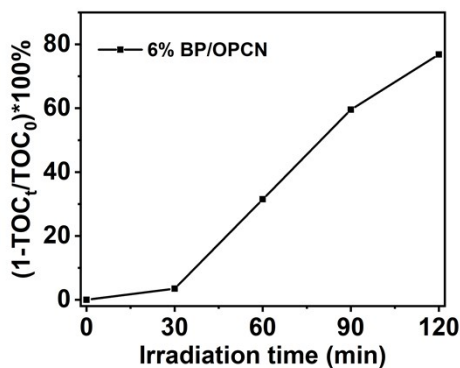

**Fig. S11** The mineralization results of MO (20 ppm) degradation over 6% BP/OPCN hybrid without IPA.

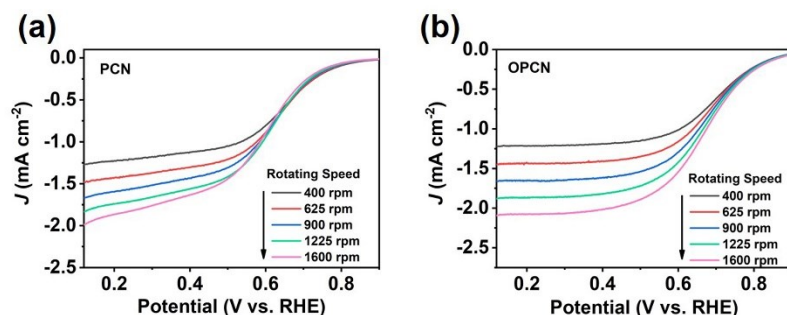

**Fig. S12** LSV curves of (a) PCN and (b) OPCN.

RDE analysis of oxygen reduction reaction (ORR) was used to investigate the pathway and selectivity of O<sub>2</sub> reduction. The average number of electrons ( $n$ ) involved

in the ORR reaction based on the following equations (Eqs. 1-2):

$$j^{-1} = j_k^{-1} + B^{-1}\omega^{-1/2} \quad (1)$$

$$B = 0.62nFC_0(D_0)^{2/3}\nu^{-1/6} \quad (2)$$

$j$  is the current density,  $j_k$  is the kinetic current density,  $\omega$  is the rotating speed (rad/s),  $F$  is the Faraday constant (96485 C mol<sup>-1</sup>),  $\nu$  is the kinetic viscosity of water (0.01 cm<sup>2</sup> s<sup>-1</sup>),  $C_0$  is the bulk concentration of O<sub>2</sub> in water (1.26×10<sup>-3</sup> mol cm<sup>-3</sup>), and  $D_0$  is the diffusion coefficient of O<sub>2</sub> (2.7×10<sup>-5</sup> cm<sup>2</sup> s<sup>-1</sup>), respectively.

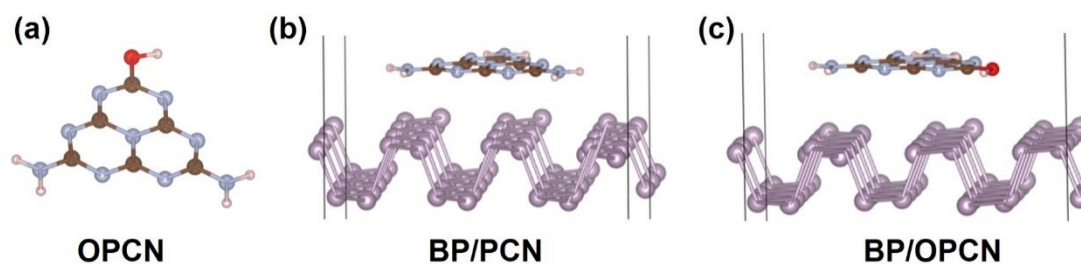

**Fig. S13** The established model of (a) OPCN, (b) BP/PCN and (c) BP/OPCN.

### S3. References

- [S1] S. Samanta, R. Yadav, A. Kumar, A. Kumar Sinha and R. Srivastava, *Appl. Catal. B Environ.*, 2019, **259**, 118054.
- [S2] S. Zhao, T. Guo, X. Li, T. Xu, B. Yang and X. Zhao, *Appl. Catal. B Environ.*, 2018, **224**, 725-732.
- [S3] Y. Yang, Z. Zeng, G. Zeng, D. Huang, R. Xiao, C. Zhang, C. Zhou, W. Xiong, W. Wang, M. Cheng, W. Xue, H. Guo, X. Tang and D. He, *Appl. Catal. B Environ.*, 2019, **258**, 117956.
- [S4] Y. Peng, L. Wang, Y. Liu, H. Chen, J. Lei and J. Zhang, *Eur. J. Inorg. Chem.*, 2017, **2017**, 4797-4802.
- [S5] Y. Zheng, Z. Yu, H. Ou, A.M. Asiri, Y. Chen and X. Wang, *Adv. Funct. Mater.*, 2018, **28**, 1705407.
- [S6] X. Zeng, Y. Liu, Y. Kang, Q. Li, Y. Xia, Y. Zhu, H. Hou, M. H. Uddin, T. R. Gengenbach, D. Xia, C. Sun, D. T. McCarthy, A. Deletic, J. Yu and X. Zhang, *ACS Catal.*, 2020, **10**, 3697-3706.

- [S7] J. Xiong, X. Li, J. Huang, X. Gao, Z. Chen, J. Liu, H. Li, B. Kang, W. Yao and Y. Zhu, *Appl. Catal. B Environ.*, 2020, **266**, 118602.
- [S8] Y. Kofuji, S. Ohkita, Y. Shiraishi, H. Sakamoto, S. Tanaka, S. Ichikawa and T. Hirai, *ACS Catal.*, 2016, **6**, 7021-7029.
- [S9] Y. Kofuji, Y. Isobe, Y. Shiraishi, H. Sakamoto, S. Tanaka, S. Ichikawa and T. Hirai, *J. Am. Chem. Soc.*, 2016, **138**, 10019-10025.
- [S10] S. Zhao, X. Zhao, H. Zhang, J. Li and Y. Zhu, *Nano Energy*, 2017, **35**, 405-414.
- [S11] S. Zhao and X. Zhao, *J. Catal.*, 2018, **366**, 98-106.
- [S12] S. Zhao and X. Zhao, *Appl. Catal. B Environ.*, 2019, **250**, 408-418.
- [S13] J. Cao, H. Wang, Y. Zhao, Y. Liu, Q. Wu, H. Huang, M. Shao, Y. Liu and Z. Kang, *J. Mater. Chem. A*, 2020, **8**, 3701-3707.
